# Supplementary material for: Flexible PVDF–NCMF nanocomposites: a synergistic approach to enhanced magneto-dielectric properties and sensing performance
Source: Royal Society of Chemistry journal article supplement (doi:10.1039/d4tc05310a), 2025-01-01
Supplement: d4tc05310a1.pdf [file d4tc05310a1.pdf]

## **SUPPORTING INFORMATION**

# **Flexible PVDF-NCMF Nanocomposites: A Synergistic Approach to Enhanced Magneto-Dielectric Properties and Sensing Performance.**

K. S. Deepa<sup>a</sup>, S. Premkumar<sup>b,c</sup>, Suwarna Datar<sup>d</sup>, V.L. Mathe<sup>e\*</sup>, C. V. Ramana<sup>e,f,\*</sup> and Sunit B. Rane<sup>a\*</sup>

*<sup>a</sup>Additive Manufacturing & Advanced Materials-Electronics & Energy (AM2E2), Centre for Materials for Electronics Technology, Off. Pashan Road, Pune 411008, India.*

*<sup>b</sup>Armament Research and Development Establishment, Pune, 411021, India.*

*<sup>c</sup>Department of Physics, Savitribai Phule Pune University, Pune 411007, India.*

*<sup>d</sup>Defence Institute of Advanced Technology (DIAT), Pune, 411025, India.*

*<sup>e</sup>Center for Advanced Materials Research (CMR), University of Texas at El Paso, El Paso, Texas 79968, USA*

*<sup>f</sup>Department of Aerospace and Mechanical Engineering, University of Texas at El Paso, El Paso, Texas 79968, USA*

## PVDF-NCMF Composites - Williamson Hall Plots & Analyses:

The Williamson-Hall (W-H) methodology considers strain-induced XRD peak broadening. This approach estimates crystal size based on intrinsic strain. Nanocrystallite size and microstrain induce physical line broadening of the X-ray diffraction peak can be expressed as:

$$\beta_{hkl} = \beta_D + \beta_\varepsilon \text{ ----- (1)}$$

where  $\beta_D$  and  $\beta_\varepsilon$  are the size and strain induced broadening in the peaks respectively.  $\beta_{hkl}$  is the Full Width at Half Maximum (FWHM) of the highest peak (in radians) and calculated using the renowned Debye-Scherrer's formula as given below.

$$D = \frac{K\lambda}{\beta_{hkl} \cos\theta} \text{ -----(2)}$$

Here D is the crystallite size, K is the Scherrer constant or shape factor,  $\lambda=1.540598 \text{ \AA}$  is the wavelength of the x-rays and  $\theta$  is Bragg's angle.  $\beta_\varepsilon$  the strain induced broadening of the XRD pattern can be calculated using the below mentioned equation,

$$\beta_\varepsilon = 4\varepsilon \cdot \tan\theta \text{ -----(3)}$$

where  $\varepsilon$  is the microstrain. Under the assumption that both particle size and strain contribute independently to line broadening and follow a Cauchy like profile, the observed phenomenon of line broadening in different planes can be well described by the sum of equations (2) and (3) as follows.

$$\beta_{hkl} = \frac{K\lambda}{D \cos\theta} + 4\varepsilon \cdot \tan\theta \text{ ----(4)}$$

After rearranging Eq. 4 can be written as

$$\beta_{hkl} \cos\theta = \frac{K\lambda}{D} + \varepsilon \cdot 4 \sin\theta \text{ ----(5)}$$

The eq. 5 is known as W-H equation under the assumption that uniform strain is exerted along all the axis of the crystal. As eq. 5 is of the form of straight line, by plotting a graph between  $\beta_{hkl} \cos\theta$  along y-axis and  $4 \sin\theta$  along x-axis of different volume percentage of NCMF, as

shown in Figure S1. The microstrain  $\epsilon$  can be calculated from the slope of the linear graph and the crystallite size from the intercept. The values are tabulated in Table S1.

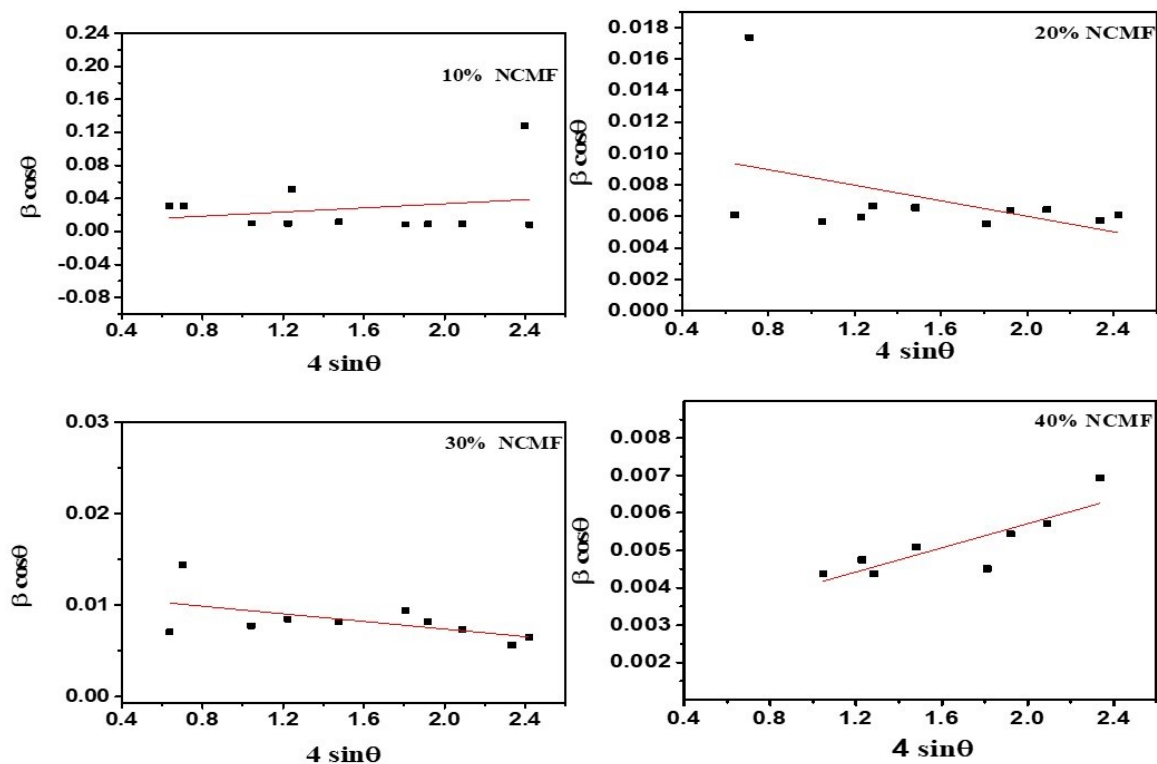

**Fig. S1.** Williamson-Hall plots of PVDF-NCMF nanocomposites. The data shown are for samples with different volume percentage of NCMF.

**Table S1.** The strain and average crystallite size of PVDF-NCMF nanocomposites determined from W-H plots.

| Volume percentage of NCMF | Strain   | Crystallite size (nm) |
|---------------------------|----------|-----------------------|
| 10                        | 0.01252  | 16.83912              |
| 20                        | -0.00247 | 13.22524              |
| 30                        | -0.00208 | 12.52737              |
| 50                        | 0.000124 | 30.943675             |

**PVDF-NCMF Composites – Raman Spectroscopic Data & Analyses:**

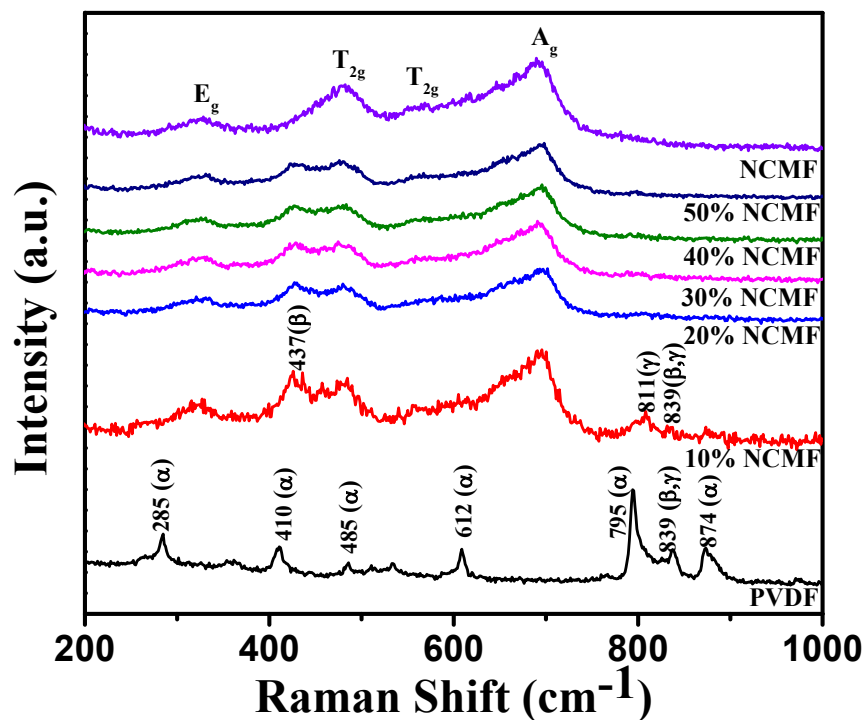

**Fig. S2.** Raman spectroscopic data of PVDF-NCMF nanocomposites. The data shown are for samples with different volume percentage of NCMF. The peaks identified are as labelled.

**Table S2.** Raman modes observed and their assignment of PVDF-NCMF nanocomposites.

| Compound | Bands (cm <sup>-1</sup> ) | Assigned vibration/ Mode                               | Phase/Polyhedra             |
|----------|---------------------------|--------------------------------------------------------|-----------------------------|
| PVDF     | 285                       | CH <sub>2</sub> -Twisting                              | α-phase                     |
|          | 485                       | CF <sub>2</sub> -Deformation                           |                             |
|          | 612                       | CF <sub>2</sub> -Wagging                               |                             |
|          | 410, 795                  | CH <sub>2</sub> -Rocking                               |                             |
|          | 874                       | CC- symmetric stretching                               |                             |
|          | 437                       | CF <sub>2</sub> -Rocking                               | β-phase                     |
|          | 811                       | CH <sub>2</sub> -Wagging                               | γ- phase                    |
|          | 839                       | CH <sub>2</sub> -Rocking & CF <sub>2</sub> -Stretching | β and γ phase               |
| NCMF     | 322                       | E <sub>g</sub>                                         | FeO <sub>6</sub> Octahedra  |
|          | 480                       | T <sub>2g</sub> (2)                                    |                             |
|          | 571                       | T <sub>2g</sub> (3)                                    |                             |
|          | 695                       | A <sub>g</sub>                                         | FeO <sub>4</sub> Tetrahedra |

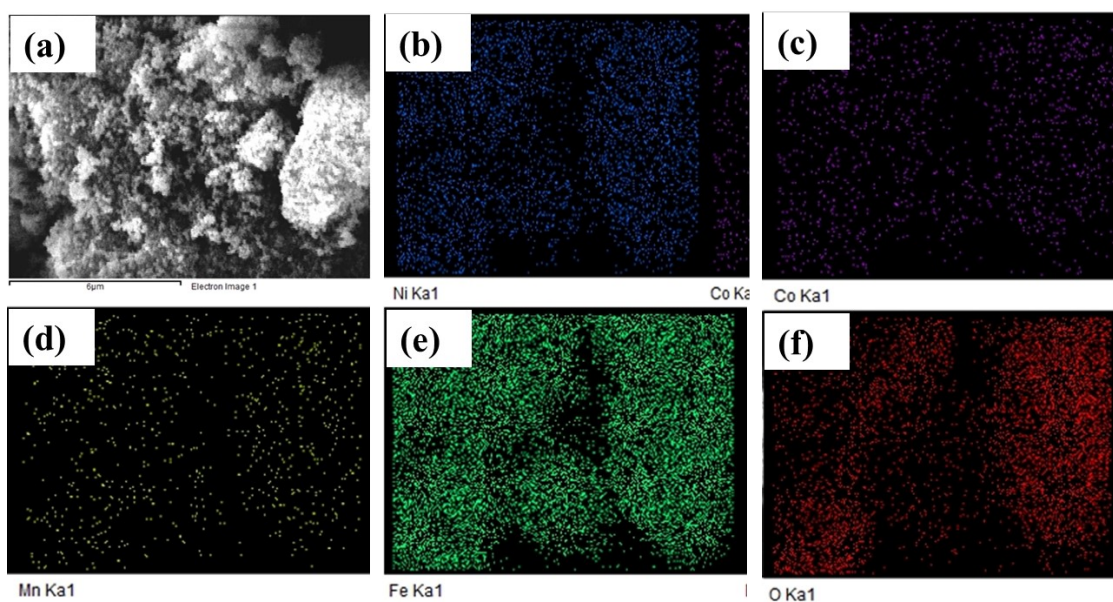

**Fig. S3.** SEM micrograph of (a) NCMF nano powder, Energy dispersive spectroscopy of NCMF nano powder with elemental maps of (b) Ni K $\alpha$ 1, (c) Co K $\alpha$ 1, (d) Mn K $\alpha$ 1, (e) Fe K $\alpha$ 1 and (f) O K $\alpha$ 1.

**Table S3.** EDS elemental composition of NCMF nano powder

| Element         | Weight % | Atomic % |
|-----------------|----------|----------|
| Ni K $\alpha$ 1 | 20.46    | 10.36    |
| Co K $\alpha$ 1 | 0.99     | 0.50     |
| Mn K $\alpha$ 1 | 1.49     | 0.81     |
| Fe K $\alpha$ 1 | 41.40    | 22.05    |
| O K $\alpha$ 1  | 35.66    | 66.28    |
